# Supplementary material for: Copy Number Profiling of MammaPrint™ Genes Reveals Association with the Prognosis of Breast Cancer Patients
Source: PubMed Central journal article supplement — J Breast Cancer. 2017 Sep 22;20(3):246–53. doi: 10.4048/jbc.2017.20.3.246 (PMC5620439; doi:10.4048/jbc.2017.20.3.246), 2017-09-22
Supplement: jbc-20-246-s003.pdf [file jbc-20-246-s003.pdf]

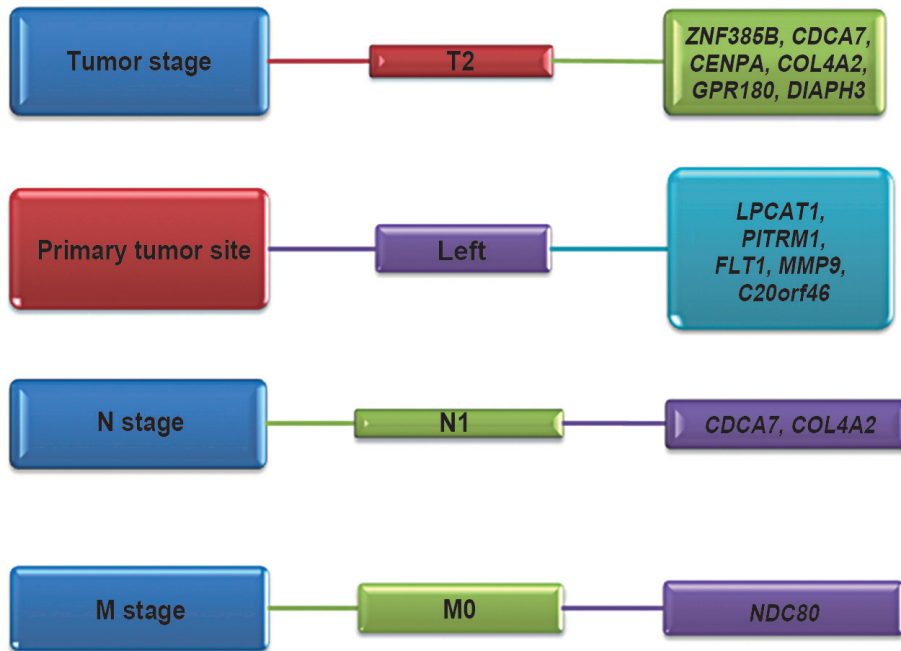

**Supplementary Figure 3.** Association of copy number variation with TNM stages and tumor primary sites ( $p < 0.05$ ).
